# Deep Learning based multi-omics integration robustly predicts survival in liver cancer

Kumardeep Chaudhary<sup>1\$</sup>, Olivier Poirion<sup>1\$</sup>, Liangqun Lu<sup>1,2</sup>, Lana X. Garmire<sup>1,2\*</sup>

<sup>1</sup> Epidemiology Program, University of Hawaii Cancer Center, Honolulu, HI 96813, USA.

<sup>2</sup> Molecular Biosciences and Bioengineering Graduate Program, University of Hawaii at Manoa, Honolulu, HI 96822, USA.

<sup>\$</sup> These authors contributed equally to the work.

<sup>\*</sup> To whom correspondence should be addressed. Email address: [lgarmire@cc.hawaii.edu](mailto:lgarmire@cc.hawaii.edu)

# Abstract

Identifying robust survival subgroups of hepatocellular carcinoma (HCC) will significantly improve patient care. Currently, endeavor of integrating multi-omics data to explicitly predict HCC survival from multiple patient cohorts is lacking. To fill in this gap, we present a deep learning (DL) based model on HCC that robustly differentiates survival subpopulations of patients in six cohorts. We train the DL based, survival-sensitive model on 360 HCC patient data using RNA-seq, miRNA-seq and methylation data from TCGA. This model provides two optimal subgroups of patients with significant survival differences ( $P=7.13e-6$ ) and good model fitness (C-index=0.68). More aggressive subtype is associated with frequent *TP53* inactivation mutations, higher expression of stemness markers (*KRT19*, *EPCAM*) and tumor marker *BIRC5*, and activated Wnt and Akt signaling pathways. We validated this multi-omics model on five external datasets of various omics types: LIRI-JP cohort (n=230, c-index=0.75), NCI cohort (n=221, c-index=0.67), Chinese cohort (n=166, c-index=0.69), E-TABM-36 cohort (n=40, c-index=0.77), and Hawaiian cohort (n=27, c-index=0.82). This is the first study to employ deep learning to identify multi-omics features linked to the differential survival of HCC patients. Given its robustness over multiple cohorts, we expect this model to be clinically useful for HCC prognosis prediction.

## Keywords:

Hepatocellular carcinoma, Multi-omics, Deep learning, Survival

# Introduction

Hepatocellular carcinoma (HCC) is the most prevalent type (70-90%) of liver cancer, and 2<sup>nd</sup> leading cancer responsible for the mortality in men<sup>1</sup>. In USA, it has the 2<sup>nd</sup> highest incidence rate and highest mortality rate<sup>2</sup>. HCC is aggravated by various risk factors, including HBV/HCV infection, nonalcoholic steatohepatitis (NASH), alcoholism, and smoking. These confounding factors along with high level of heterogeneity have rendered HCC prognosis a much challenging task<sup>3,4</sup>. HCC is a detrimental disease with poor prognosis in general, where median survival is less than 2 years<sup>5</sup>. In particular, 5-year survival rate of HBV-associated HCC is less than 30% in multiple studies<sup>5-8</sup>. Treatment strategies in HCC are very limited, imposing additional urgent needs for developing tools to predict patient survival<sup>9</sup>.

To understand the HCC heterogeneity among patients, a considerable amount of work has been done to identify the HCC molecular subtypes<sup>10-16</sup>. A variety of numbers of subtypes were identified, ranging from 2 to 6, based on various omics data types, driving hypotheses and computational methods. Besides most commonly used mRNA gene expression data, a recent study integrated copy number variation (CNV), DNA methylation, mRNA and miRNA expression to identify the 5 HCC molecular subtypes from 256 TCGA samples<sup>17</sup>. However, most of these studies explored the molecular subtypes without relying on survival during the process of defining subtypes. Rather, survival information was used *post hoc* to evaluate the clinical significance of these subtypes<sup>17</sup>. As a result, some molecular subtypes showed converging and similar survival profile, making them redundant subtypes in terms of survival differences<sup>13</sup>. New approaches to discover survival-sensitive and multi-omics data based molecular subtypes are much needed in HCC research.

To address these issues, for the first time, we have utilized deep learning (DL) computational framework on multi-omics HCC data sets. We chose autoencoder framework as the implementation of DL for multi-omics integration. Autoencoders have already been proved to be efficient approaches to produce features linked to clinical outcomes<sup>18</sup>. And it was successfully applied to analyze high-dimensional gene expression data<sup>19,20</sup>, and to integrate heterogeneous data<sup>21,22</sup>. Notably, autoencoder transformation tends to aggregate genes sharing similar pathways<sup>23</sup>, therefore making it appealing to interpret the biological functions. The contributions of this study to HCC field is not only manifested in its thorough and integrative computational rigor, but also unify the

discordant molecular subtypes into robust subtypes that withstand the testing of various cohorts, even when they are in different omics forms.

We derived the model from 360 HCC samples in TCGA multi-omics cohort, which have mRNA expression, miRNA expression, CpG methylation and clinical information. We discovered two subtypes with significant differences in survival. These subtypes hold independent predictive values on patient survival, apart from clinical characteristics. Most importantly, the two subtypes obtained from our DL framework are successfully validated in five independent cohorts, which have miRNA or mRNA or DNA methylation results. Functional analysis of these two subtypes identified that gene expression signatures (*KIRT19*, *EPCAM* and *BIRC5*) and Wnt signaling pathways are highly associated with poor survival. In summary, the survival-sensitive subtypes model reported here is significant for both HCC prognosis prediction and therapeutic intervention.

## Results

### Two differential survival subtypes are identified in TCGA multi-omics HCC data

From the TCGA HCC project, we obtained 360 tumor samples that had coupled RNA-seq, miRNA-seq and DNA methylation data. For these 360 samples, we pre-processed the data as described in the ‘Materials and Methods’ section, and obtained 15,629 genes from RNA-seq, 365 miRNAs from miRNA-seq, and 19,883 genes from DNA methylation data as input features. These three types of omics features were stacked together using autoencoder, a deep learning framework<sup>24</sup>. The architecture of autoencoder is shown in Figure 1A. It has 5 layers of nodes: an input layer, a hidden layer for encoding, a bottleneck layer, a hidden layer for decoding, and an output layer. We used *tanh* function for activation and retrieved 100 new transformed features from the bottleneck layer. We then conducted univariate Cox-PH regression on each of the 100 features, and identified 37 features significantly (log-rank p-value <0.05) associated with survival. These 37 features were subjective to K-means clustering, with cluster number K ranging from 2 to 6 (Figure 1B). Using silhouette index and the Calinski-Harabasz criterion, we found that K=2 was the optimum with the best scores for both metrics (Supplementary Fig. 1A). Further, the survival analysis on the full TCGA HCC data shows that the survivals in the two sub-clusters are drastically different (log-rank p-value =7.13e-6, Figure 2A). Moreover, K=2 to 6 yielded

KM survival curves that essentially represent 2 significantly different survival groups (Supplementary Fig. 1B). Thus, we determined that K=2 was the classification labels for the subsequent supervised machine learning processes.

We next used the 2 classes determined above as the labels to build a classification model using the support vector machine (SVM) algorithm with cross-validation (CV) (Fig. 1B). We split the 360 TCGA samples into 10 folds using 60/40 ratio for training and testing data. We chose 60/40 split, rather than a conventional 90/10 split, in order to have sufficient testing samples for sensible log-rank p-values in the survival analysis (see ‘Materials and Methods’). Additionally, we assessed the accuracy of the survival subtype predictions using C-index, which measures the fraction of all pairs of individuals whose predicted survival times are ordered correctly<sup>25</sup>. We also calculated the error of the model fitting on survival data using Brier score<sup>26</sup>. On average, the training data generated high C-index ( $0.70 \pm 0.04$ ), low brier score ( $0.19 \pm 0.01$ ), and significant average log-rank p-value (0.001) on survival difference (Table 1). Similar trend was observed for the 3-omics held-out testing data, with C-index= $0.69 \pm 0.08$ , Brier score= $0.20 \pm 0.02$ , and average survival p-value=0.005 (Table 1). When tested on each single omic layer of data, this multi-omics model also has decent performances, in terms of C-index, low Brier scores and log-rank p-values (Table 1). These results demonstrate that the classification model using cluster labels is robust to predict survival-specific clusters.

The performance of the model described in Fig. 1B is superior to the alternative model, where autoencoder is replaced by traditional dimension reduction approach namely Principal Component Analysis (PCA). The PCA approach failed to give significant log-rank p-value ( $\alpha=0.05$ ) in survival subgroups. It also yielded significantly lower C-indices for both the training (0.63, p-value<0.01) and testing (0.62, p-value < 0.05) data (Supplementary Table 1), as compared to the model using autoencoder. Worth noticing, the 3-omics based DL model gives better prediction metrics in CV, when compared to single-omics based DL models (Supplementary Table 2), suggesting that indeed multi-omics data are better than single-omics data for model building.

## **The survival subtypes are robustly validated in five independent cohorts**

To demonstrate the robustness of the classification model at predicting survival outcomes, we validated the model on a variety of five independent cohorts, each of which had only mRNA, or miRNA or methylation omics

data (Table 2 and Fig. 2 B-F). LIRI-JP dataset is the RNA-seq data set with the most number of patients (n=230); we achieved a good C-index 0.75, a low Brier error rate of 0.16 and the log-rank p-values of  $4.4 \times 10^{-4}$  between the two subtypes. For the second largest (n=221) NCI cohort (GSE14520), the two subgroups have decent C-index of 0.67 and low Brier error rate of 0.18 with log-rank p-value of  $1.05 \times 10^{-3}$  (Table 2). For Chinese cohort (GSE31384), the miRNA array data with 166 samples, the two subgroups have C-index of 0.69, low Brier error rate of 0.21, and log-rank p-value of  $8.49 \times 10^{-4}$  (Table 2). Impressively, the C-indices for the two smallest cohorts, E-TABM-36 (40 samples) and Hawaiian cohorts (27 samples) are very good, with values of 0.77 and 0.82, respectively. The p-values obtained for the small cohorts after resampling are also significant, with values of  $3.06 \times 10^{-4}$  and  $1.19 \times 10^{-8}$ , respectively (Fig. 2B-F).

## **Adding clinical information does not improve DL-based multi-omics model**

It remains to see if the DL based multi-omics model will improve the predictability, by adding clinical information. Therefore, we assessed the performance of alternative models with clinical variables as the features, either alone or in combination with previous DL-based multi-omics model (Table 3). When clinical features were used as the sole feature set for survival prediction, the models' performances were much poorer (Table 3), when compared to the DL-based genomic model (Table 2). Then we combined the clinical features with the 3 omics layers before the k-means clustering step in Fig. 1B. Surprisingly, the C-indices of the combined model were not better on the validation cohorts with larger sample sizes (LIRI-JP, NCI and E-TABM-36 cohorts), compared to those of DL-based multi-omics model. C-index and p-value were only slightly but not statistically significantly better for the Hawaiian cohort, which has only 27 samples. We thus conclude that the DL-based multi-omics model performs sufficiently well even without clinical features. We speculate the reason is due to the unique advantage of DL neural network, which can capture the redundant contributions of clinical features through their correlated genomic features.

## **Associations of survival-subgroups with clinical covariates**

We performed the Fisher's exact test between the two survival subgroups and the clinical variables from TCGA cohort, and found that only grade ( $P=0.0004$ ) and stage ( $P=0.002$ ) were significantly associated with survival, as

expected. Since HCC is aggravated by the multiple risk factors including HBC, HCV, and alcohol, we also tested our model within subpopulations stratified by individual risk factors (Table 4). Impressively, our model performed very well on all the risk factor categories with C-indices ranging from 0.69-0.79, and Brier scores between 0.19 and 0.20. Log-rank P-values were significant in HBV infected patients (P=0.04), alcohol consumers (P=0.005) and other category (P=0.0035). The only non-significant p-value (P=0.20) was obtained from the HCV infected patients, probably attributed to the small group size (n=31).

TP53 is one of the most frequently mutated genes in HCC, and its inactivation mutations have been reported to be associated with poor survival in the HCC<sup>27</sup>. Between the 2 survival subgroups S1 and S2 in TCGA samples, TP53 is more frequently mutated in the aggressive subtype S1 (Fisher's test p-value=0.042). Further, TP53 inactivation mutations are associated with the aggressive subtype S1 in LIRI-JP cohort, where whole genome sequencing data are available (p-value=0.024).

## Functional analysis of the survival-subgroups in TCGA HCC samples

We used DESeq2 package<sup>28</sup> for differential gene expression between the two identified subtypes. After applying the filter of log2 fold change >1 and FDR <0.05, we obtained 820 up-regulated and 530 down-regulated genes in the aggressive sub-cluster S1. Fig. 3 shows the comparative expression profile of these 1350 genes after normalization. The up-regulated genes in the S1 cluster include the stemness marker gene, *EPCAM* (P=5.7e-6), *KRT19* (P=6.7e-15) and tumor marker *BIRC5* (P=1.2e-13) genes, which were also reported earlier to be associated with aggressive HCC subtype<sup>29-31</sup>. Additionally, 18 genes (*ADH1B*, *ALDOA*, *APOC3*, *CYP4F12*, *EPHX2*, *KHK*, *PFKFB3*, *PKLR*, *PLG*, *RGN*, *RGS2*, *RNASE4*, *SERPINC1*, *SLC22A7*, *SLC2A2*, *SPHK1*, *SULT2A1*, *TM4SF1*) differentially expressed in the two subtypes have similar trends of expression as in the previous study, where a panel of 65-gene signature was associated with the HCC survival<sup>32</sup>.

Using the differentially expressed genes above, we conducted KEGG pathway analysis to pinpoint the pathways enriched in two subtypes. These subtypes have different and (almost) disjoint active pathways, confirming that they are distinct subgroups at the pathway level (Fig. 4). Aggressive subtype S1 is enriched with cancer related pathways, Wnt signaling pathway, PI3K-Akt signaling pathway etc. (Fig. 4A). Wnt signaling pathway was reported being associated with aggressive HCC previously<sup>33</sup>. In contrast, the moderate subtype S2 has activated

metabolism related pathways including drug metabolism, amino acid and fatty acid metabolism etc. (Fig. 4B). We performed similar differential analysis for miRNA expression and methylation data, and detected 23 miRNAs and 55 genes' methylation statistically different between the two subgroups (Supplementary Fig. 2 and File 1).

## Discussion

Heterogeneity is one of the bottlenecks for understanding the HCC etiology. Though there are many studies for subtype identification of the HCC patients, embedding survival outcome of the patients as part of the procedure of identified subtypes has not been reported before. Moreover, most reported HCC subtype models have either no or very few external validation cohorts. This calls for better strategies, where the identified subtypes could reflect the phenotypic outcome of the patients i.e. the survival directly. Present work includes the integration of the multi-omics data from the same patients, giving an edge by exploiting the improved signal-to-noise ratio. To our knowledge, we are the first to use the deep learning framework to integrate multi-omics information in HCC. It propels deep learning to develop risk stratification model, not only for prognostication but also instrumental for improvising risk-adapted therapy in HCC.

We have identified two subtypes from the molecular level. This model is robust and perhaps more superior than other approaches, manifested in several levels. First, CV results gave the consistent performance in TCGA HCC testing samples, implying the reliability and robustness of the model. Secondly, deep-learning technique used in the model has captured sufficient variations due to potential clinical confounders, such that it performs as accurately or even better than, having additional clinical features in the model. Thirdly, autoencoder framework has much more efficiency to infer features linked to survival, compared to PCA. Lastly and most importantly, this model is repetitively validated in five additional cohorts, ranging from RNA-seq, mRNA microarray, miRNA array, and DNA methylation platforms.

In association with clinical characteristics, the more aggressive subtype (S1) has consistent trends of association with higher TP53 inactivation mutation frequencies in the TCGA and LIRI-JP cohorts, which is in concordance with the previous study<sup>27</sup>. Association of stemness markers (*KRT19*, *EPCAM*) with S1 subtype is also in



congruence with the literature<sup>29,30</sup>. Moreover, S1 subtype is enriched with activated Wnt signaling pathway<sup>33</sup>. Despite our effort, the one to one comparison with the previous studies is not feasible due to the absence of cluster label information in original reports, and lack of survival data in some cases. Fortunately, we were able to identify five external validation cohorts encompassing different omic dataset, and succeeded in validating the subtypes among them. These results gave enough confidence that the 2 survival subtype model proposed in this report is of direct clinical importance, and maybe useful to improve HCC patients survival.

# Methods

## Datasets

**TCGA Training dataset:** We trained the model on multi-omics HCC data from the TCGA portal (<https://tcga-data.nci.nih.gov/tcga/>). We used R package TCGA-assembler (v1.0.3)<sup>34</sup> and obtained 360 samples with RNA-seq data (UNC IlluminaHiSeq\_RNASeqV2; Level 3), miRNA-seq data (BCGSC IlluminaHiSeq\_miRNASeq; Level 3), DNA methylation data (JHU-USC HumanMethylation450; Level 3), and the clinical information. For the DNA methylation, we mapped CpG islands within 1500 bp of transcription start sites (TSS) of genes and averaged their methylation values. In dealing with the missing values (preprocessing of data), three steps were performed as elsewhere<sup>35</sup>. First, the biological features (e.g. genes) were removed if having zero value in more than 20% of patients. The samples were removed if missing across more than 20% features. Then we used *impute* function from R impute package<sup>36</sup>, to fill out the missing values. Lastly, we removed genes with zero values across all samples.

**Validation dataset 1 (LIRI-JP cohort, RNA-seq):** 230 samples with RNA-seq data were obtained from ICGC portal (<https://dcc.icgc.org/projects/LIRI-JP>). These samples belong to Japanese population primarily infected with HBV/HCV<sup>37</sup>. We used the normalized read count values given in the gene expression file.

**Validation dataset 2 (NCI cohort, GSE14520-microarray gene expression):** 221 samples with survival information were chosen from GSE14520 Affymetrix high-throughput GeneChip HG-U133A microarray dataset, from an earlier study of HCC patients<sup>38</sup>. This is a Chinese population primarily associated with HBV infection. Log2 Robust Multi-array Average (RMA)-calculated signal intensity values provided by the authors were used for analysis.

**Validation dataset 3 (Chinese cohort, GSE31384-miRNA expression):** 166 pairs of HCC/matched noncancerous normal tissue samples were downloaded, with CapitalBio custom Human miRNA array data (GSE31384)<sup>39</sup>. Since the data were already log2 transformed, we used unit-scale normalization.

**Validation dataset 4 (E-TABM-36-microarray gene expression):** 40 HCC samples were used, with survival information and transcriptional profiling from Affymetrix HG-U133A GeneChips arrays platform<sup>13</sup>. We used the CHPSignal values for the further processing as a measure of gene expression.

**Validation dataset 5 (DNA Methylation):** 27 samples were used, with genome-wide methylation profiling from Illumina HumanMethylation450 BeadChip platform<sup>40</sup>. Probe to gene conversion was done the same way as for TCGA HCC methylation data.

All the available clinical information for the validation cohorts is listed in Supplementary Table 3.

## Deep Learning framework

We used the 3 pre-processed TCGA HCC omics data sets as the input for the autoencoders framework. We stacked the 3 matrices that are unit-norm scaled by sample, in order to form a unique matrix as reported before<sup>41</sup>. An autoencoder is a feedforward, non-recurrent neural network<sup>24</sup>. Given an input layer  $x$ , the objective of an autoencoder is to reconstruct  $x$  by the output layer  $x'$  ( $x$  and  $x'$  have the same dimension), via transforming  $x$  through successive hidden layers. For a given layer  $i$ , we used  $\tanh$  as activation function between input layer  $x$  and output layer  $y$ . That is:

$$y = f_i(x) = \tanh(W_i x + b_i)$$

Where  $W_i$  is the coefficient matrix and  $b_i$  the intercept. For an autoencoder with  $k$  layers,  $x'$  is then given by:

$$x' = F_{1 \rightarrow k}(x) = f_1 \circ \dots \circ f_k(x)$$

We chose  $\logloss$  as objective function:

$$\logloss(x, x') = \sum_{k=1}^d (x_k \log(x'_k) + (1 - x_k) \log(1 - x'_k))$$

In order to control overfitting, we added a L1 regularization penalty on the coefficient weight  $W_i$ , and a L2 regularization penalty on the hidden nodes activities:  $F_{1 \rightarrow k}(x)$ . Thus the objective function to minimize becomes:

$$L(x, x') = \logloss(x, x') + \sum_{i=1}^k (\alpha_w \|W_i\|_1 + \alpha_a \|F_{1 \rightarrow i}(x)\|_2^2)$$

## New feature selection and K-means clustering

We used the bottleneck layer of the autoencoder to select features linked to survival. For each node of this layer, we computed the activity of the node for every sample from the training set and built a Cox-PH model using the survival data. We selected nodes from which a significant Cox-PH model is obtained (log-rank p-value < 0.05). We then used these new features to cluster the samples using the k-means clustering algorithm. We determined the optimal number of clusters with two metrics: Silhouette index<sup>42</sup> and Calinski-Harabasz criterion<sup>43</sup>. We used the *scikit-learn* package as the K-Means implementation<sup>44</sup>.

## Supervised classification

Using the labels obtained from K-means clustering, we built a supervised classification model using Support Vector machine (SVM) algorithm. We first selected common features between the training and the validation datasets. We then applied robust-scaling on the validation dataset, using the means and the standard deviations of the training dataset<sup>45</sup>. Finally, we selected the top N features which are most correlated with the cluster labels, using ANOVA F-values. We set default N values as 200 for mRNAs, 200 for methylation and 50 for miRNAs. We used grid search approach to find the best hyperparameters of the SVM classifier, using 5-fold CV for each set of parameters. We used the *scikit-learn* package to build the SVM models, perform the grid search and compute the ANOVA<sup>44</sup>.

## Robustness assessment

We performed robustness assessment using a CV like procedure. We used a 60/40% split (training/test sets) of the TCGA data, in order to have sufficient number of test samples that generate evaluation metrics. We first randomly split the 360 samples from TCGA into 5 folds and used each pair of folds as a new fold (40% of the data), thus obtaining 10 new folds. For each fold, we constructed a model using the 60% remaining samples and predicted the labels for the sample from the fold.

## Evaluation metrics for models

The metrics used closely reflects the accuracy of survival prediction in the subgroups identified. Three sets of evaluation metrics were used.

*Concordance index (C-index):* The c-index can be seen as the fraction of all pairs of individuals whose predicted survival times are correctly ordered<sup>25</sup> and is based on Harrel's C statistics<sup>46</sup>. A C-index score around 0.70 indicates a good model, whereas a score around 0.50 means random background.

To compute the c-index, we first built a Cox-PH model using the training dataset (cluster labels and survival data) and predict survival using the labels of the test/validation dataset. We then calculated the concordance index (c-index) using function `concordance.index` in R *survcomp* package<sup>47</sup>. To compute the C-index using the multiple clinical features, we built a Cox-PH using the *glmnet* package<sup>48</sup> instead, which enables penalization through ridge regression. Before building the Cox-PH model, we performed a 10-fold cross-validation to find the best lambda.

*Log-rank p-value of Cox-PH regression:* We plotted the Kaplan-Meier survival curves of the two risk groups, and calculated the log-rank p-value of the survival difference between them. We used Cox proportional hazards (Cox-PH) model for survival analysis<sup>49</sup>, similar to described before<sup>50,51</sup>, using R *survival* package<sup>52</sup>. For the two datasets with a low number of samples, E-TABM-36 (40 samples) and the Hawaiian methylation dataset (27 samples), we amplified the number of samples by randomly selecting with 200 replacement samples, in order to obtain the reliable statistical power.

*Brier score:* It is another score function that measures the accuracy of probabilistic prediction<sup>26</sup>. In survival analysis, the brier score measures the mean of the difference between the observed and the estimated survival beyond a certain time<sup>53</sup>. The score ranges between 0 and 1 and a larger score indicates higher inaccuracy. We used the implementation of Brier score from R *survcomp* package.

## Functional analysis

A number of functional analyses were performed to understand the characteristics of 2 survival risk subtypes of TCGA HCC samples.

*TP53 mutation analysis:* We analyzed the somatic mutation frequency distributions in the survival subtypes for the *TP53* gene, among TCGA and LIRI-JP cohorts. TCGA and LIRI-JP cohorts have exome sequencing and whole genome sequencing data for 186 and 230 samples with survival data, respectively. We performed Fisher's test on *TP53* mutation between two survival risk groups.

*Clinical covariate analysis:* We tested the associations of our identified subtypes with other clinical characters, including gender, race, grade, stage and risk factors, using Fisher's exact tests. To test if the two survival risk subtypes have prognostic values in addition to clinical characteristics, we built a combined Cox-PH model with survival risk classification and clinical data, and compared it to the one with only clinical data (stage, grade, race, gender, age and risk factor).

*Differential Expression:* In order to identify the differential expressed genes between the two survival risk subtypes, we performed the differential expression analysis for the mRNA, miRNA expression and methylation genes. We used DESeq2 package<sup>28</sup> to identify the differential gene and miRNA expression between the 2 subtypes (false discovery rate, or FDR <0.05). Additionally, we used log2 fold change greater than 1 as filtering for mRNA/miRNA. For methylation data, we transformed the beta values into M values as elsewhere<sup>54,55</sup> using the *lumi* package in R<sup>56</sup>. We fit the linear model for each gene using *lmFit* function followed by empirical Bayes method, using *limma* package in R<sup>57</sup>. It uses moderate t-tests to determine significant difference in methylation for each gene between S1 and S2 subtypes (Benjamin-Hochberg corrected P<0.05). Additionally, we used averaged M value differences greater than 1 as filtering. We used volcano plot to show the differentially methylated genes in two subtypes.

*Enriched pathway analysis:* We used upregulated and downregulated genes for the KEGG pathway analysis, using the functional annotation tool from the online DAVID interface<sup>58,59</sup>. We used a p-value threshold of 0.10 to consider a pathway significant. We plot the gene-pathway network using Gephi<sup>60</sup>.

## Acknowledgements

This research was supported by grants K01ES025434 awarded by NIEHS through funds provided by the trans-NIH Big Data to Knowledge (BD2K) initiative (<http://datascience.nih.gov/bd2k>), P20 COBRE GM103457

awarded by NIH/NIGMS, NICHD R01 HD084633 and NLM R01LM012373 and Hawaii Community Foundation Medical Research Grant 14ADVC-64566 to LX Garmire.

## Author contributions

LXG envisioned the project, LL and KC prepared the dataset. OP, KC and LL developed the pipeline. KC, OP, LL and LXG wrote the manuscript. All authors have read, revised, and approved the final manuscript.

## Conflict of interest

The authors declared no conflict of interest.

## References

- 1 Torre, L. A. *et al.* Global cancer statistics, 2012. *CA Cancer J Clin* **65**, 87-108 (2015).
- 2 Siegel, R. L., Miller, K. D. & Jemal, A. Cancer statistics, 2015. *CA Cancer J Clin* **65**, 5-29 (2015).
- 3 Marrero, J. A., Kudo, M. & Bronowicki, J. P. The challenge of prognosis and staging for hepatocellular carcinoma. *Oncologist* **15 Suppl 4**, 23-33 (2010).
- 4 Colagrande, S. *et al.* Challenges of advanced hepatocellular carcinoma. *World J Gastroenterol* **22**, 7645-7659 (2016).
- 5 Nguyen, V. T., Law, M. G. & Dore, G. J. Hepatitis B-related hepatocellular carcinoma: epidemiological characteristics and disease burden. *J Viral Hepat* **16**, 453-463 (2009).
- 6 Trevisani, F. *et al.* Impact of etiology of cirrhosis on the survival of patients diagnosed with hepatocellular carcinoma during surveillance. *Am J Gastroenterol* **102**, 1022-1031 (2007).
- 7 Chen, C. H. *et al.* Hepatitis B- and C-related hepatocellular carcinomas yield different clinical features and prognosis. *Eur J Cancer* **42**, 2524-2529 (2006).

- 8      Chen, C. H. *et al.* Long-term trends and geographic variations in the survival of patients with hepatocellular carcinoma: analysis of 11,312 patients in Taiwan. *J Gastroenterol Hepatol* **21**, 1561-1566 (2006).
- 9      Llovet, J. M. *et al.* Sorafenib in advanced hepatocellular carcinoma. *N Engl J Med* **359**, 378-390 (2008).
- 10     Chen, X. *et al.* Gene expression patterns in human liver cancers. *Mol Biol Cell* **13**, 1929-1939 (2002).
- 11     Lee, J. S. *et al.* Classification and prediction of survival in hepatocellular carcinoma by gene expression profiling. *Hepatology* **40**, 667-676 (2004).
- 12     Breuhahn, K. *et al.* Molecular profiling of human hepatocellular carcinoma defines mutually exclusive interferon regulation and insulin-like growth factor II overexpression. *Cancer Res* **64**, 6058-6064 (2004).
- 13     Boyault, S. *et al.* Transcriptome classification of HCC is related to gene alterations and to new therapeutic targets. *Hepatology* **45**, 42-52 (2007).
- 14     Chiang, D. Y. *et al.* Focal gains of VEGFA and molecular classification of hepatocellular carcinoma. *Cancer Res* **68**, 6779-6788 (2008).
- 15     Hoshida, Y. *et al.* Integrative transcriptome analysis reveals common molecular subclasses of human hepatocellular carcinoma. *Cancer Res* **69**, 7385-7392 (2009).
- 16     Goossens, N., Sun, X. & Hoshida, Y. Molecular classification of hepatocellular carcinoma: potential therapeutic implications. *Hepat Oncol* **2**, 371-379 (2015).
- 17     Liu, G., Dong, C. & Liu, L. Integrated Multiple "-omics" Data Reveal Subtypes of Hepatocellular Carcinoma. *PLoS One* **11**, e0165457 (2016).
- 18     Tan, J., Ung, M., Cheng, C. & Greene, C. S. Unsupervised feature construction and knowledge extraction from genome-wide assays of breast cancer with denoising autoencoders. *Pac Symp*



- Biocomput*, 132-143 (2015).
- 19 Chen, L., Cai, C., Chen, V. & Lu, X. Learning a hierarchical representation of the yeast transcriptomic machinery using an autoencoder model. *BMC Bioinformatics* **17 Suppl 1**, 9 (2016).
- 20 Khalili, M., Alavi Majd, H., Khodakarim, S., Ahadi, B. & Hamidpour, M. Prediction of the Thromboembolic Syndrome: an Application of Artificial Neural Networks in Gene Expression Data Analysis. 2016 %9 Thromboembolic syndrome; gene expression data; principal component analysis (PCA);auto-encoder neural networks %! Prediction of the Thromboembolic Syndrome: an Application of Artificial Neural Networks in Gene Expression Data Analysis **7**, 8 (2016).
- 21 Miotto, R., Li, L., Kidd, B. A. & Dudley, J. T. Deep Patient: An Unsupervised Representation to Predict the Future of Patients from the Electronic Health Records. *Sci Rep* **6**, 26094 (2016).
- 22 Chen, Q., Song, X., Yamada, H. & Shibasaki, R. in *Thirtieth AAAI Conference on Artificial Intelligence*.
- 23 Tan, J., Hammond, J. H., Hogan, D. A. & Greene, C. S. ADAGE-Based Integration of Publicly Available Pseudomonas aeruginosa Gene Expression Data with Denoising Autoencoders Illuminates Microbe-Host Interactions. *mSystems* **1** (2016).
- 24 Bengio, Y. Learning deep architectures for AI. *Foundations and trends® in Machine Learning* **2**, 1-127 (2009).
- 25 Steck, H., Krishnapuram, B., Dehing-oberije, C., Lambin, P. & Raykar, V. C. in *Advances in neural information processing systems*. 1209-1216.
- 26 Brier, G. W. Verification of forecasts expressed in terms of probability. *Monthly weather review* **78**, 1-3 (1950).
- 27 Villanueva, A. & Hoshida, Y. Depicting the role of TP53 in hepatocellular carcinoma

- progression. *J Hepatol* **55**, 724-725 (2011).
- 28 Love, M. I., Huber, W. & Anders, S. Moderated estimation of fold change and dispersion for RNA-seq data with DESeq2. *Genome Biol* **15**, 550 (2014).
- 29 Yamashita, T. *et al.* EpCAM and alpha-fetoprotein expression defines novel prognostic subtypes of hepatocellular carcinoma. *Cancer Res* **68**, 1451-1461 (2008).
- 30 Andersen, J. B. *et al.* Progenitor-derived hepatocellular carcinoma model in the rat. *Hepatology* **51**, 1401-1409 (2010).
- 31 Cao, L. *et al.* OCT4 increases BIRC5 and CCND1 expression and promotes cancer progression in hepatocellular carcinoma. *BMC Cancer* **13**, 82 (2013).
- 32 Kim, S. M. *et al.* Sixty-five gene-based risk score classifier predicts overall survival in hepatocellular carcinoma. *Hepatology* **55**, 1443-1452 (2012).
- 33 White, B. D., Chien, A. J. & Dawson, D. W. Dysregulation of Wnt/beta-catenin signaling in gastrointestinal cancers. *Gastroenterology* **142**, 219-232 (2012).
- 34 Zhu, Y., Qiu, P. & Ji, Y. TCGA-assembler: open-source software for retrieving and processing TCGA data. *Nat Methods* **11**, 599-600 (2014).
- 35 Wang, B. *et al.* Similarity network fusion for aggregating data types on a genomic scale. *Nat Methods* **11**, 333-337 (2014).
- 36 Xiang, Q. *et al.* Missing value imputation for microarray gene expression data using histone acetylation information. *BMC Bioinformatics* **9**, 252 (2008).
- 37 Fujimoto, A. *et al.* Whole-genome mutational landscape and characterization of noncoding and structural mutations in liver cancer. *Nat Genet* **48**, 500-509 (2016).
- 38 Roessler, S. *et al.* A unique metastasis gene signature enables prediction of tumor relapse in early-stage hepatocellular carcinoma patients. *Cancer Res* **70**, 10202-10212 (2010).
- 39 Wei, R. *et al.* Clinical significance and prognostic value of microRNA expression signatures in

- hepatocellular carcinoma. *Clin Cancer Res* **19**, 4780-4791 (2013).
- 40 Song, M. A. *et al.* Elucidating the landscape of aberrant DNA methylation in hepatocellular carcinoma. *PLoS One* **8**, e55761 (2013).
- 41 Liu, F., Li, H., Ren, C., Bo, X. & Shu, W. PEDLA: predicting enhancers with a deep learning-based algorithmic framework. *Sci Rep* **6**, 28517 (2016).
- 42 Rousseeuw, P. J. Silhouettes: A graphical aid to the interpretation and validation of cluster analysis. *Journal of Computational and Applied Mathematics* **20**, 53-65 (1987).
- 43 Caliński, T. & Harabasz, J. A dendrite method for cluster analysis. *Communications in Statistics* **3**, 1-27 (1974).
- 44 Pedregosa, F. *et al.* Scikit-learn: Machine learning in Python. *Journal of Machine Learning Research* **12**, 2825-2830 (2011).
- 45 Angermueller, C., Parnamaa, T., Parts, L. & Stegle, O. Deep learning for computational biology. *Mol Syst Biol* **12**, 878 (2016).
- 46 Lee, K. & Mark, D. Multivariable prognostic models: issues in developing models, evaluating assumptions and adequacy, and measuring and reducing errors. *Stat Med* **15**, 361-387 (1996).
- 47 Schröder, M. S., Culhane, A. C., Quackenbush, J. & Haibe-Kains, B. survcomp: an R/Bioconductor package for performance assessment and comparison of survival models. *Bioinformatics* **27**, 3206-3208 (2011).
- 48 Friedman, J., Hastie, T. & Tibshirani, R. Regularization paths for generalized linear models via coordinate descent. *Journal of statistical software* **33**, 1 (2010).
- 49 Cox, D. R. in *Breakthroughs in statistics* 527-541 (Springer, 1992).
- 50 Wei, R. *et al.* Meta-dimensional data integration identifies critical pathways for susceptibility, tumorigenesis and progression of endometrial cancer. *Oncotarget* **7**, 55249-55263 (2016).
- 51 Huang, S., Yee, C., Ching, T., Yu, H. & Garmire, L. X. A novel model to combine clinical and

- pathway-based transcriptomic information for the prognosis prediction of breast cancer. *PLoS Comput Biol* **10**, e1003851 (2014).
- 52 Therneau, T. A package for survival analysis in S. R package version 2.38. (2015).
- 53 Zhang, X. *et al.* Pathway-Structured Predictive Model for Cancer Survival Prediction: A Two-Stage Approach. *bioRxiv*, 043661 (2016).
- 54 Ching, T. *et al.* Genome-scale hypomethylation in the cord blood DNAs associated with early onset preeclampsia. *Clin Epigenetics* **7**, 21 (2015).
- 55 Ching, T. *et al.* Genome-wide hypermethylation coupled with promoter hypomethylation in the chorioamniotic membranes of early onset pre-eclampsia. *Mol Hum Reprod* **20**, 885-904 (2014).
- 56 Du, P., Kibbe, W. A. & Lin, S. M. lumi: a pipeline for processing Illumina microarray. *Bioinformatics* **24**, 1547-1548 (2008).
- 57 Ritchie, M. E. *et al.* limma powers differential expression analyses for RNA-sequencing and microarray studies. *Nucleic Acids Res* **43**, e47 (2015).
- 58 Huang da, W., Sherman, B. T. & Lempicki, R. A. Bioinformatics enrichment tools: paths toward the comprehensive functional analysis of large gene lists. *Nucleic Acids Res* **37**, 1-13 (2009).
- 59 Huang da, W., Sherman, B. T. & Lempicki, R. A. Systematic and integrative analysis of large gene lists using DAVID bioinformatics resources. *Nat Protoc* **4**, 44-57 (2009).
- 60 Bastian, M., Heymann, S. & Jacomy, M. *Gephi: An Open Source Software for Exploring and Manipulating Networks*. (2009).

# Figure Legends

## **Figure 1: Overall workflow**

(A) Autoencoder architecture used to integrate 3 omics of HCC data. (B) Workflow combining deep learning and machine learning techniques to infer HCC subtypes in an unsupervised manner.

## **Figure 2: Significant survival differences for TCGA and external validation cohorts**

(A) TCGA cohort, (B) LIRI-JP cohort, (C) NCI cohort, (D) Chinese cohort, (E) E-TABM-36 cohort, and (F) Hawaiian cohort.

## **Figure 3: Differentially expressed genes and their enriched pathways in the two subtypes from TCGA cohort**

S1: aggressive (higher-risk survival) subtype; S2: moderate (lower-risk survival) subtype.

## **Figure 4: Bipartite graph for significantly enriched KEGG pathways and upregulated genes in two subtype.**

Enriched pathway-gene analysis for upregulated genes in the (A) S1 aggressive tumor sub-group and (B) less aggressive S2 sub-group.

# Tables

**Table 1:** Cross-validation based performance robustness of SVM classifier on training and testing dataset in TCGA cohort.

| Dataset      | 10-folds CV         | C-index            | Brier score        | Log-rank p-value<br>(geo. mean) |
|--------------|---------------------|--------------------|--------------------|---------------------------------|
| <b>Train</b> | 3-omics train (60%) | 0.70 ( $\pm$ 0.04) | 0.19 ( $\pm$ 0.01) | 0.001                           |
|              | 3-omics test (40%)  | 0.69 ( $\pm$ 0.08) | 0.20 ( $\pm$ 0.02) | 0.005                           |
| <b>Test</b>  | RNA only            | 0.68 ( $\pm$ 0.07) | 0.20 ( $\pm$ 0.02) | 0.01                            |
|              | MIR only            | 0.69 ( $\pm$ 0.07) | 0.20 ( $\pm$ 0.02) | 0.003                           |
|              | METH only           | 0.66 ( $\pm$ 0.07) | 0.20 ( $\pm$ 0.02) | 0.031                           |

**Table 2:** Performance of classifier for the five external validation dataset.

| <b>Validation cohort</b> | <b>Omics Data type</b>        | <b>Reference</b> | <b># samples</b> | <b>C-index</b> | <b>Brier score</b> | <b>Log-rank p-value</b> |
|--------------------------|-------------------------------|------------------|------------------|----------------|--------------------|-------------------------|
| <b>LIRI-JP<br/>NCI</b>   | RNA-Seq<br>mRNA<br>microarray | 37               | 230              | 0.75           | 0.16               | 4.4e-4                  |
|                          |                               | 38               | 221              | 0.67           | 0.18               | 1.05e-3                 |
| <b>Chinese</b>           | miRNA<br>array                | 39               | 166              | 0.69           | 0.21               | 8.49e-4                 |
| <b>E-TABM-36</b>         | mRNA<br>microarray            | 13               | 40               | 0.77           | 0.19               | 3.06e-4*                |
| <b>Hawaiian</b>          | DNA<br>methylation            | 40               | 27               | 0.82           | 0.19               | 1.19e-8*                |

\*p-value obtained after resampling, due to small sample sizes.

**Table 3:** Performance of the model using clinical features on validation datasets.

| <b>Validation cohort</b> | <b>C-index (clinic only)</b> | <b>C-index (Combined<sup>#</sup>)</b> | <b>Brier score</b> | <b>Log-rank p-value</b> |
|--------------------------|------------------------------|---------------------------------------|--------------------|-------------------------|
| <b>LIRI-JP</b>           | 0.55                         | 0.74                                  | 0.16               | 0                       |
| <b>NCI</b>               | 0.45                         | 0.65                                  | 0.19               | 0.007                   |
| <b>E-TABM-36</b>         | 0.50                         | 0.75                                  | 0.19               | 0.007 <sup>*</sup>      |
| <b>Hawaiian</b>          | 0.70                         | 0.87                                  | 0.19               | 4.05e-11 <sup>*</sup>   |

<sup>#</sup>Combined = clinical + DL-based class labels

<sup>\*</sup>p-value obtained using resampling datasets



**Table 4:** Full model performance within each subpopulation stratified by the clinical confounders in TCGA cohort.

| <b>Confounder</b> | <b># samples</b> | <b>C-index</b> | <b>Brier score</b> | <b>Log-rank<br/>p-value</b> |
|-------------------|------------------|----------------|--------------------|-----------------------------|
| <b>HBV</b>        | 74               | 0.74           | 0.20               | 0.04                        |
| <b>HCV</b>        | 31               | 0.69           | 0.19               | 0.20                        |
| <b>Alcohol</b>    | 67               | 0.79           | 0.20               | 0.005                       |
| <b>Others</b>     | 59               | 0.77           | 0.19               | 0.0035                      |

# Supplementary Materials

**Supplementary Figure 1:** (A) Selection of the best subcluster K according to Silhouette score and Calinski-Harabasz score. (B) Kaplan-Meier plots show the separation of subtypes in terms of survival profiles from K=2 to 6.

**Supplementary Figure 2:** Differential tests for miRNAs and Methylation (A) heatmap shows the differentially expressed miRNAs in two subtypes and (B) Volcano plot showing the differentially methylated genes in two subtypes. Red dotted line: BH adjusted p-value=0.05; blue dotted line: p-value=0.05 without adjustment. Red color: genes differentially methylated with BH adjusted p-value <0.05 and absolute mean difference >1 between the two subtypes.

**Supplementary Table 1:** Performance of PCA on training and testing dataset on different metrics.

**Supplementary Table 2:** Performance of Models constructed with one omic only.

**Supplementary Table 3:** Clinical Characteristics of the HCC cohorts used in this study.

**Supplementary File 1:** Description of results on differential tests of miRNAs and methylation.

(A)

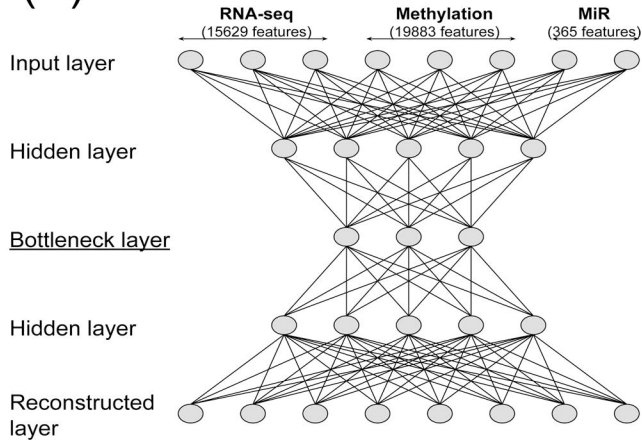

(B)

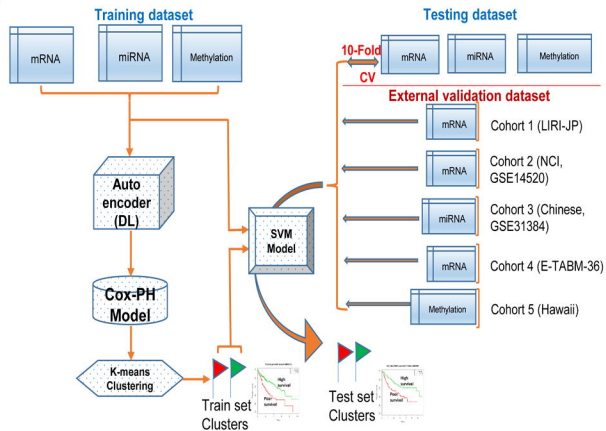

**(A)****TCGA cohort (Log-rank P value 0.00000713)**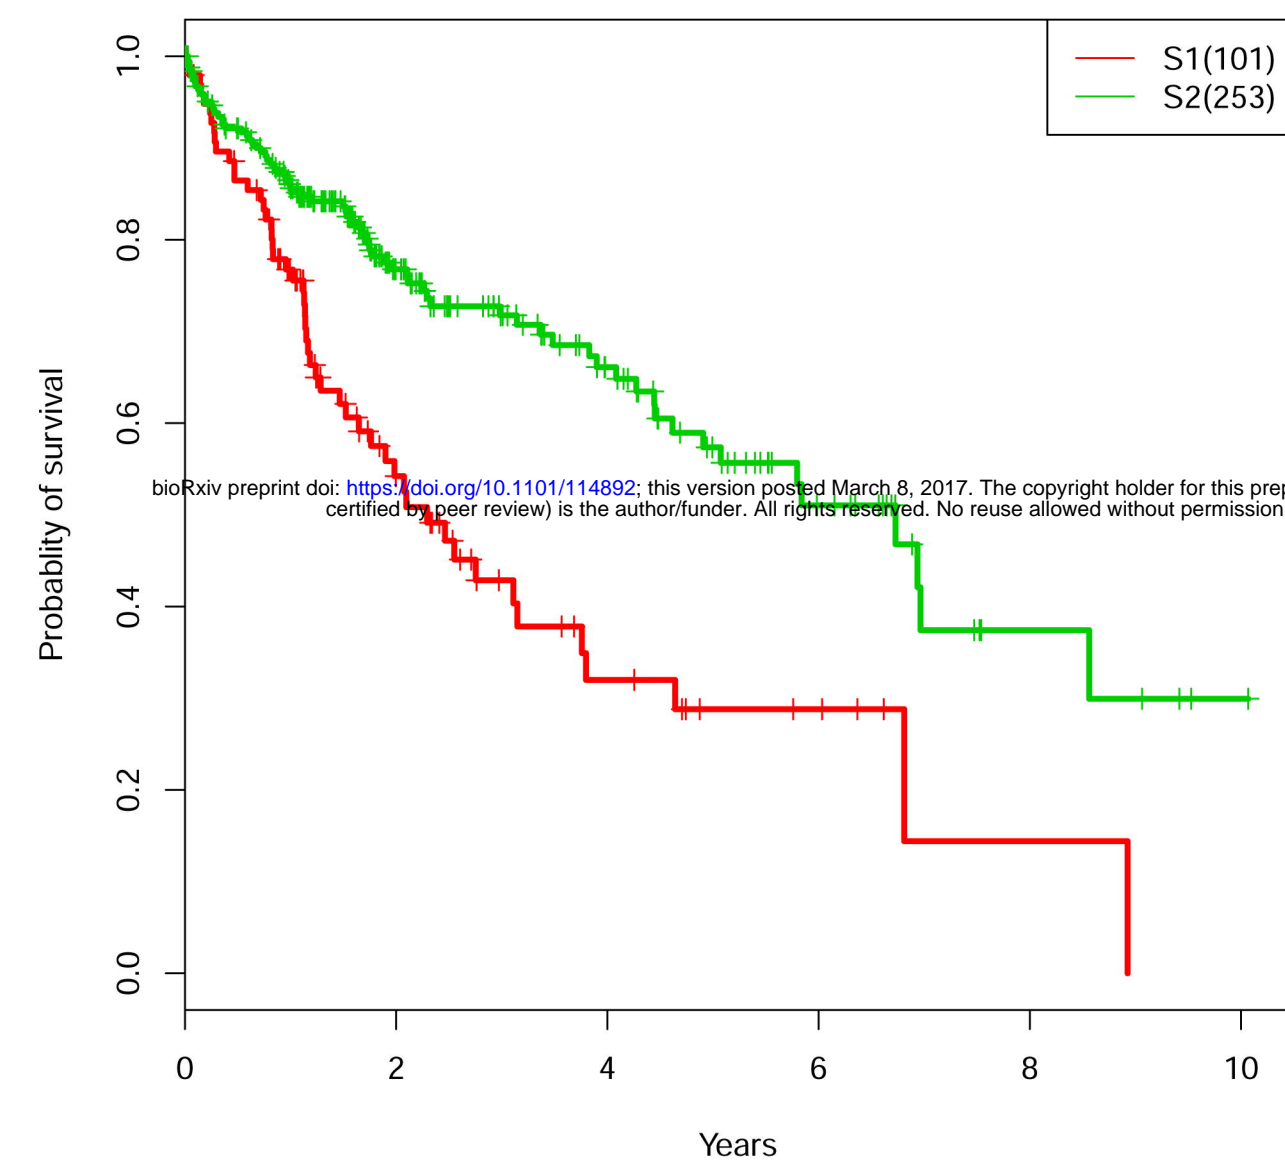**(B)****LIRI-JP cohort (Log-rank P value 0.000442)**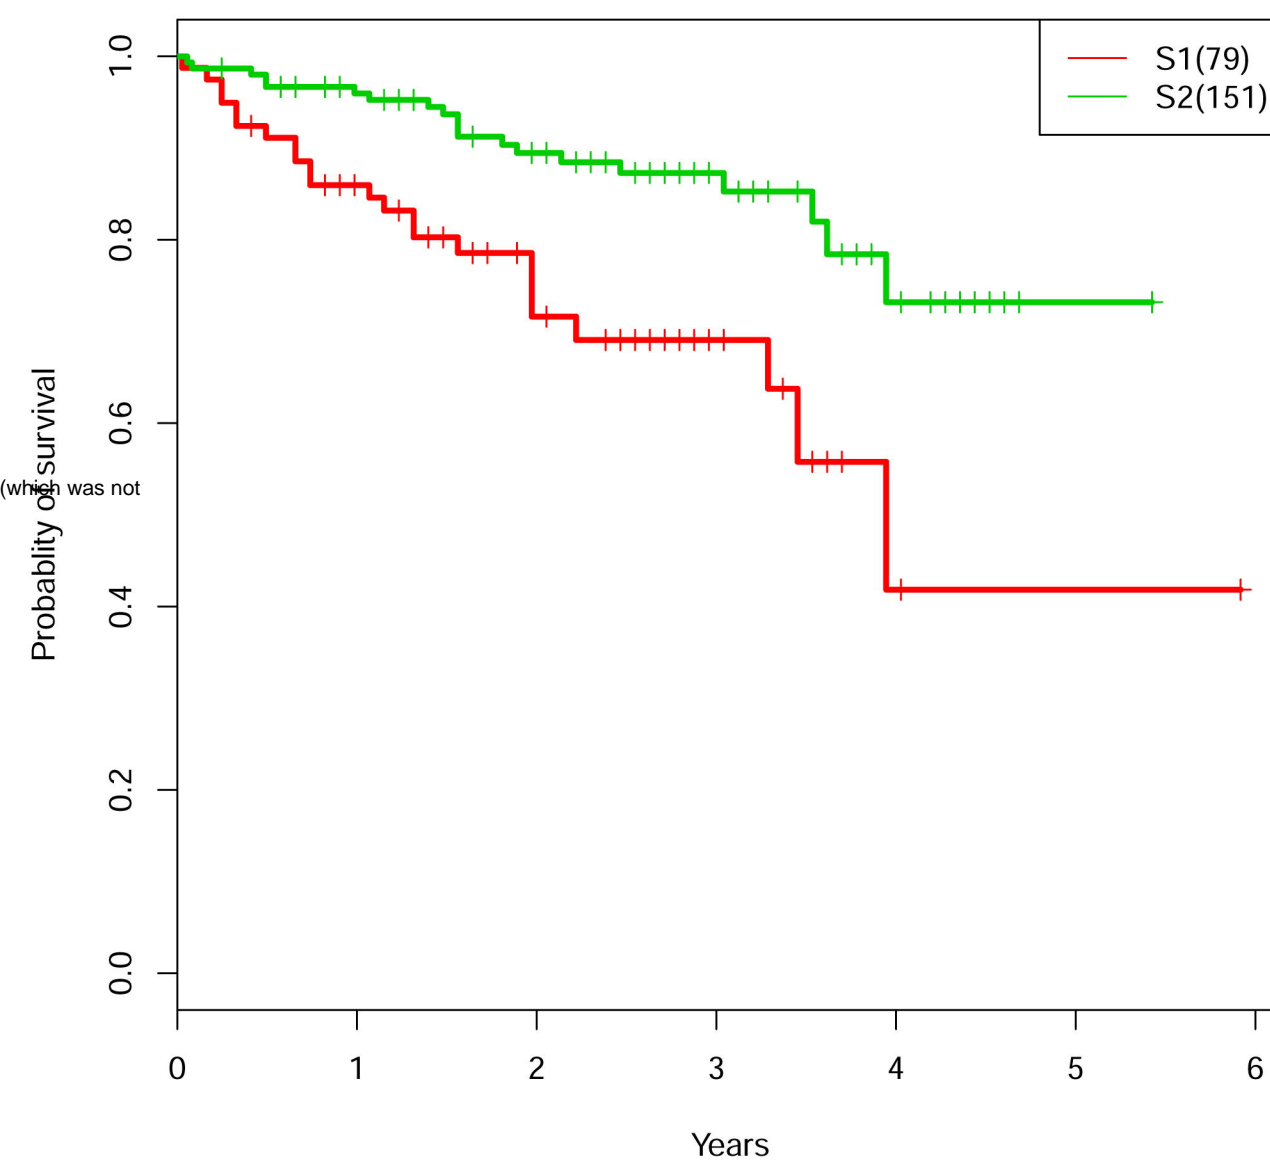**(C)****NCI cohort (Log-rank P value 0.00105)**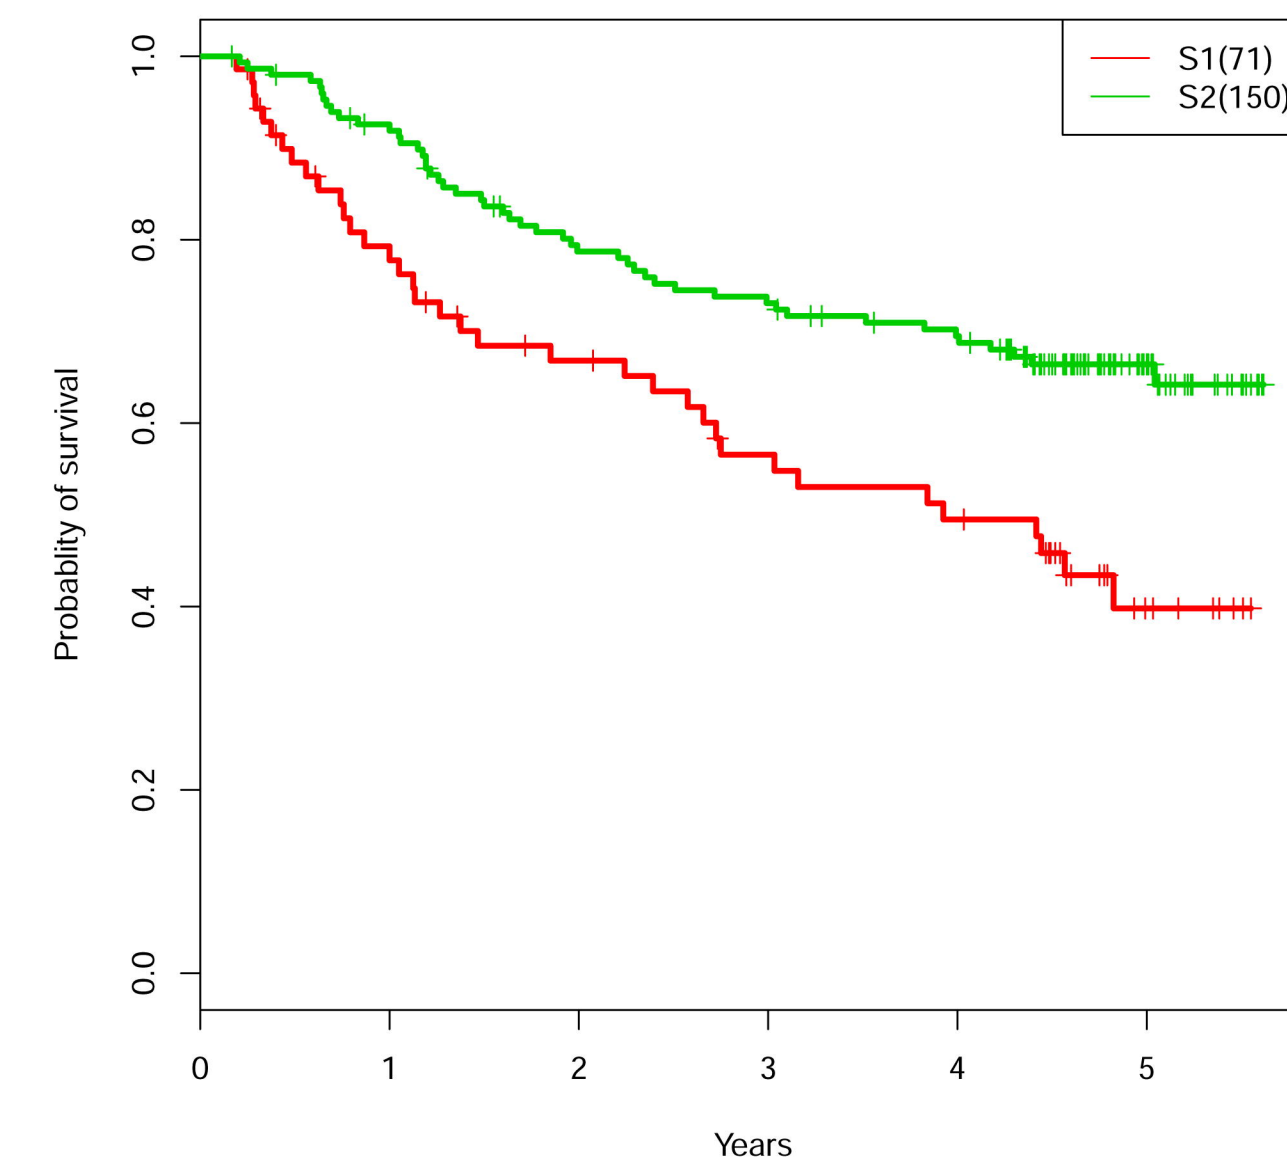**(D)****miRNA\_GSE31384 cohort (Log-rank P value 0.000849)**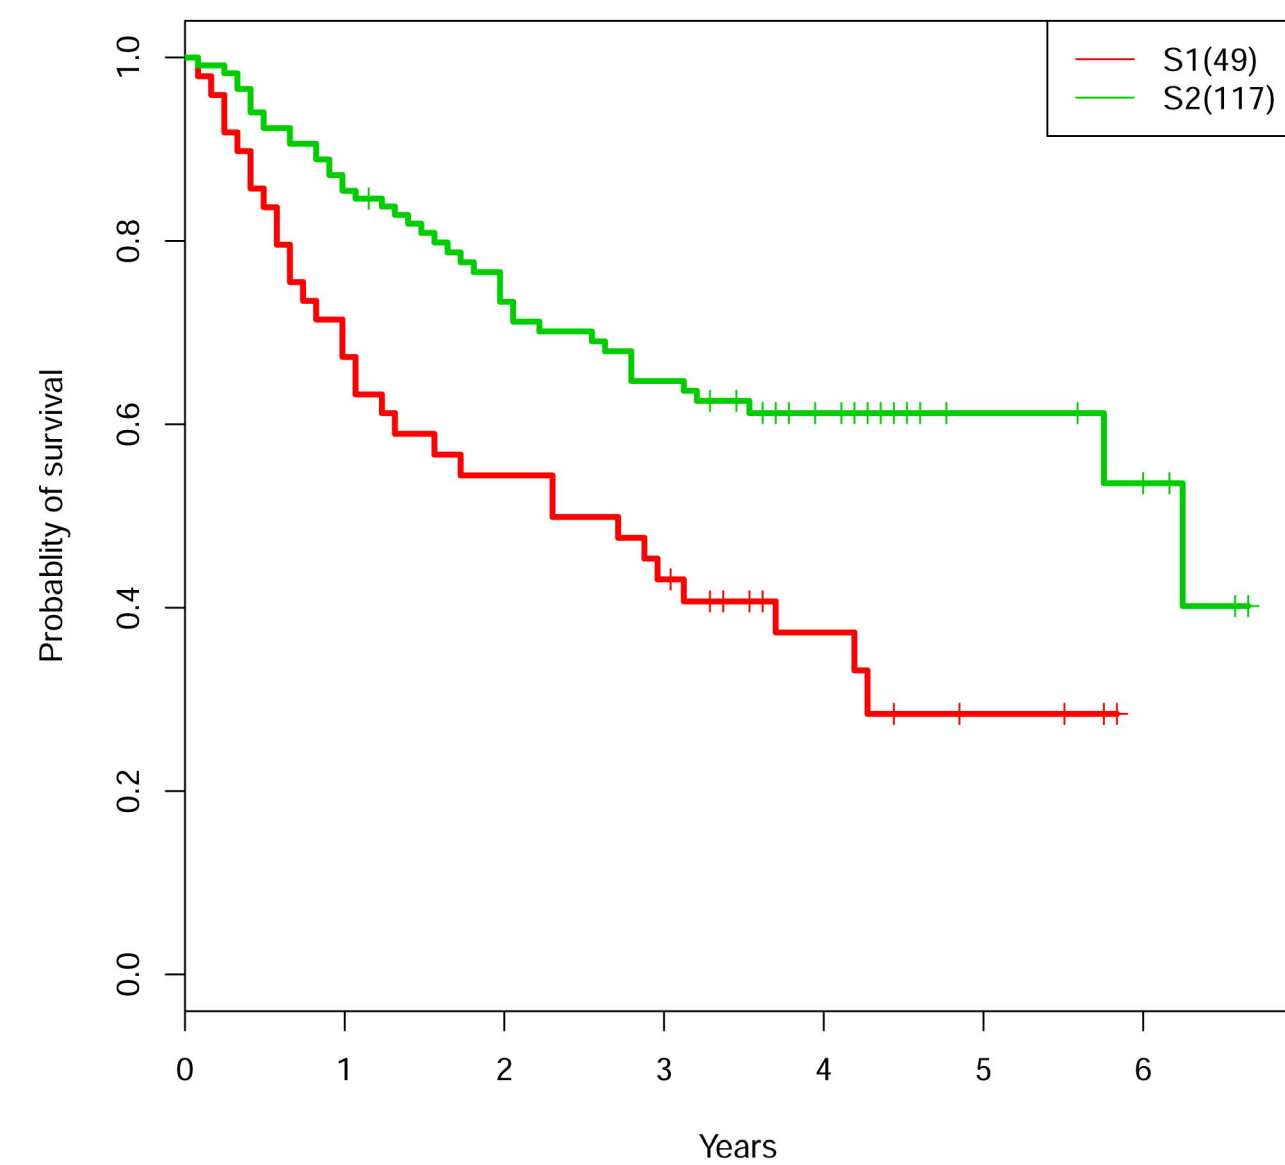**(E)****E-TABM-36 cohort (Log-rank P value 0.000306)**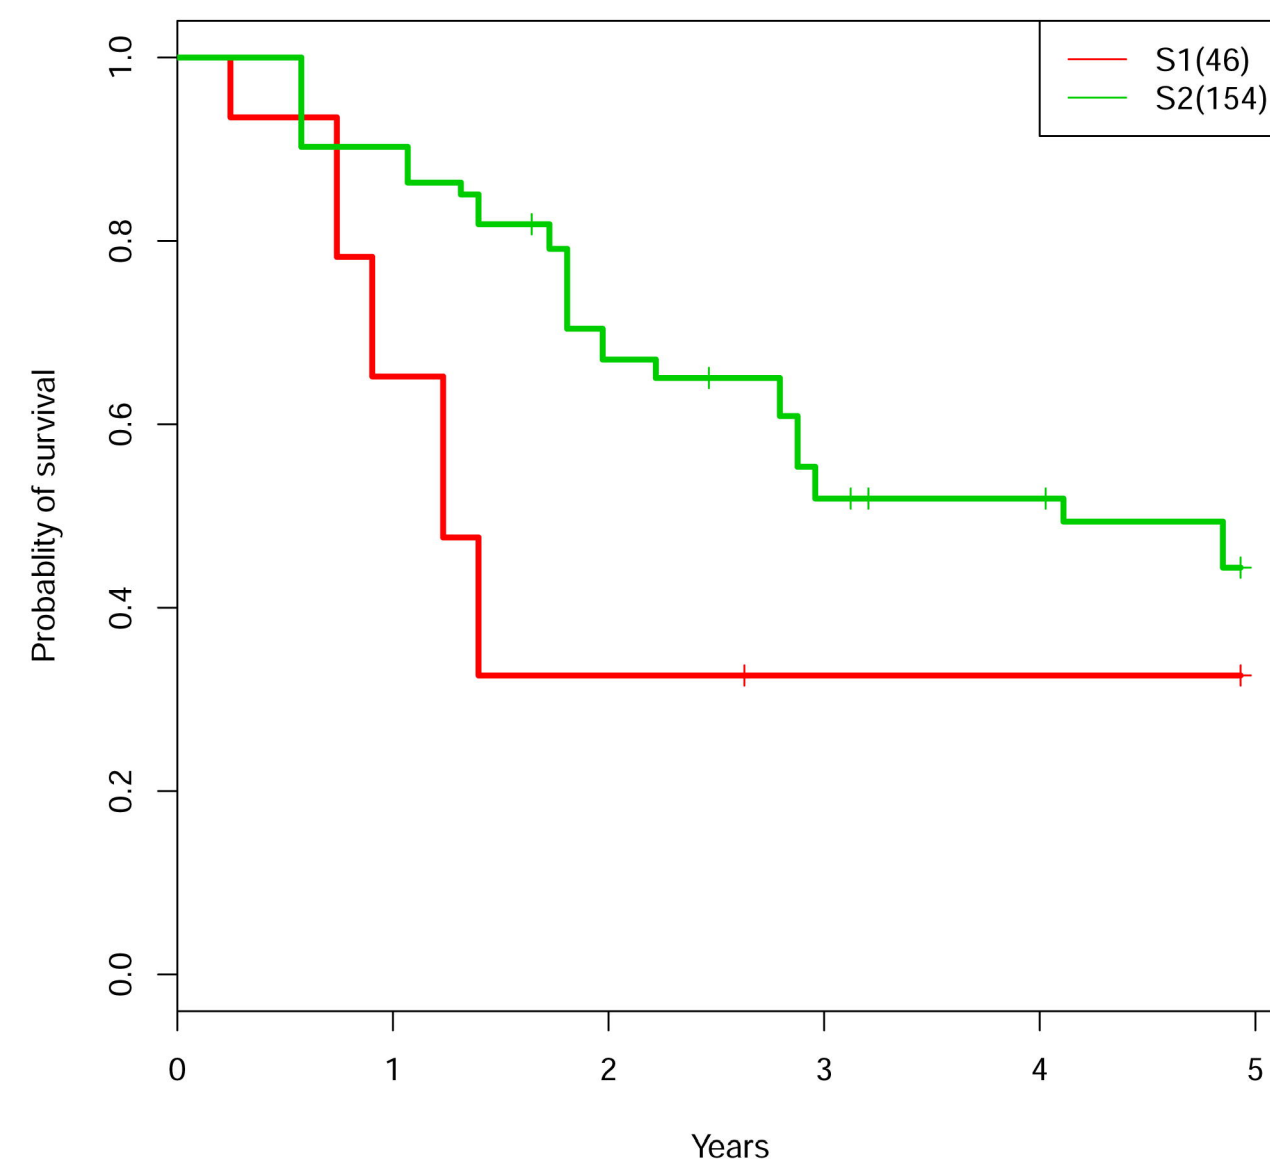**(F)****Hawaiian cohort (Log-rank P value 1.19e-08)**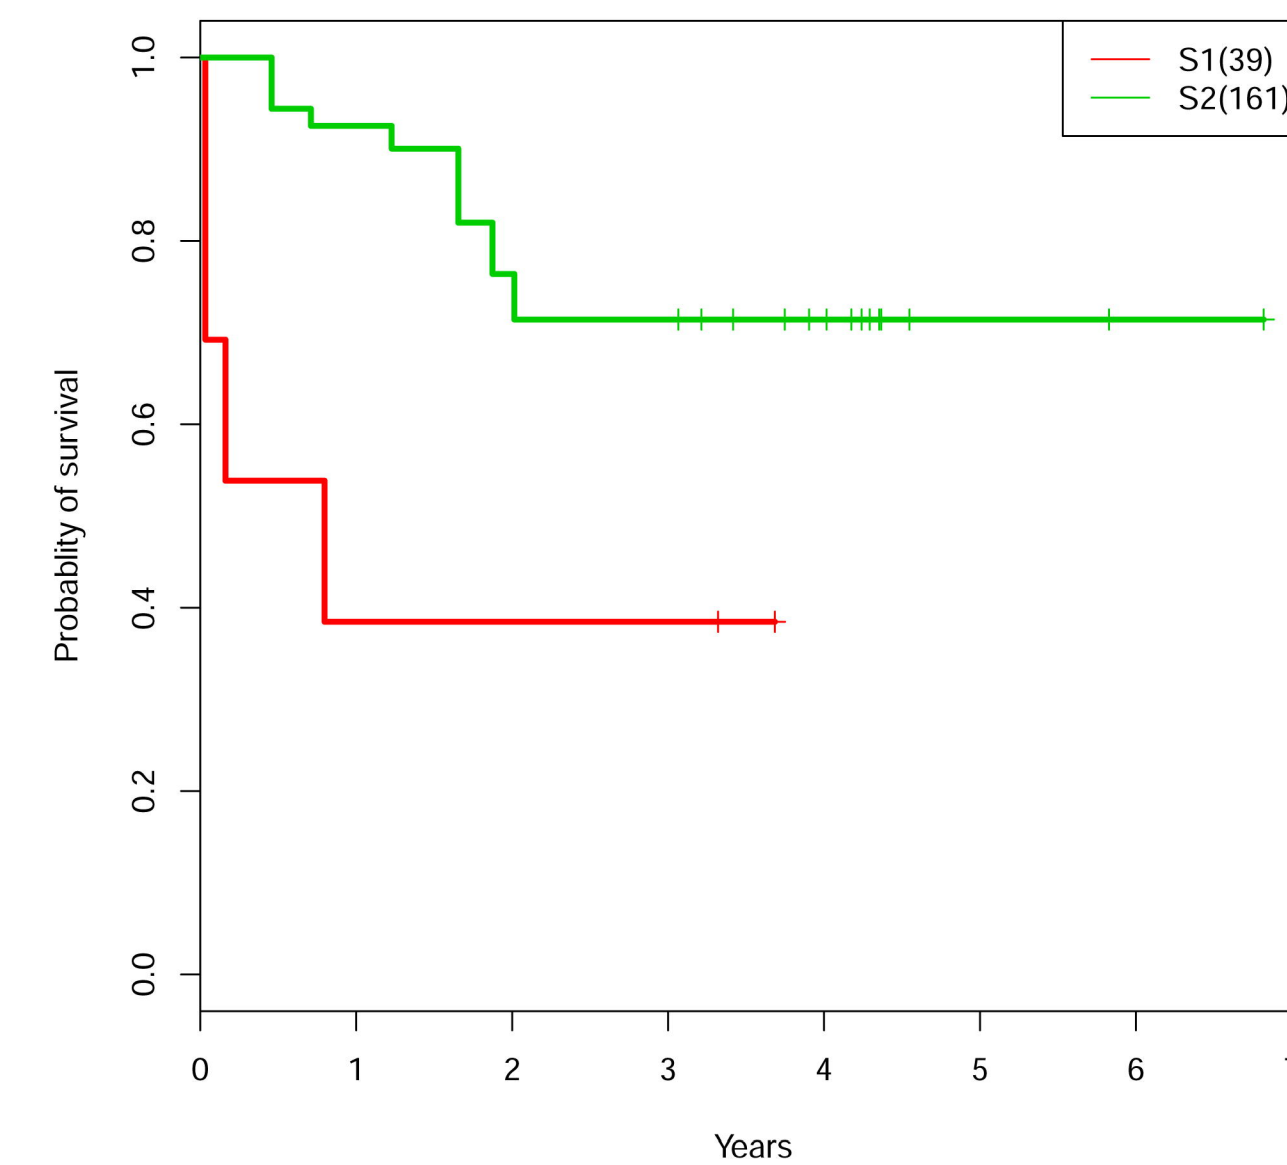

| Pathway name                     | EASE score | # genes |
|----------------------------------|------------|---------|
| Pathways in cancer               | 0.024      | 27      |
| PI3K-Akt signaling pathway       | 0.0214     | 24      |
| Focal adhesion                   | 0.0178     | 20      |
| Proteoglycans in cancer          | 0.0169     | 19      |
| Hippo signaling pathway          | 0.0134     | 15      |
| Regulation of actin cytoskeleton | 0.0134     | 15      |
| ECM-receptor interaction         | 0.0125     | 14      |
| Axon guidance                    | 0.0116     | 13      |
| cAMP signaling pathway           | 0.0116     | 13      |
| Wnt signaling pathway            | 0.0107     | 12      |
| cGMP-PKG signaling pathway       | 0.0107     | 12      |
| Calcium signaling pathway        | 0.0107     | 12      |
| Protein digestion and absorption | 0.0098     | 11      |

| Pathway name                                 | EASE score | # genes |
|----------------------------------------------|------------|---------|
| Metabolic pathways                           | 0.19       | 123     |
| Chemical carcinogenesis                      | 0.0417     | 27      |
| Biosynthesis of antibiotics                  | 0.0417     | 27      |
| Retinol metabolism                           | 0.0371     | 24      |
| Drug metabolism - cytochrome P450            | 0.034      | 22      |
| Metabolism of xenobiotics by cytochrome P450 | 0.034      | 22      |
| Steroid hormone biosynthesis                 | 0.0278     | 18      |
| Bile secretion                               | 0.0278     | 18      |
| PPAR signaling pathway                       | 0.0263     | 17      |
| Peroxisome                                   | 0.0263     | 17      |
| Carbon metabolism                            | 0.0263     | 17      |
| Complement and coagulation cascades          | 0.0232     | 15      |
| Drug metabolism - other enzymes              | 0.0216     | 14      |
| Glycolysis / Gluconeogenesis                 | 0.0201     | 13      |
| Fatty acid degradation                       | 0.0185     | 12      |
| Glycine, serine and threonine metabolism     | 0.017      | 11      |
| Tryptophan metabolism                        | 0.017      | 11      |

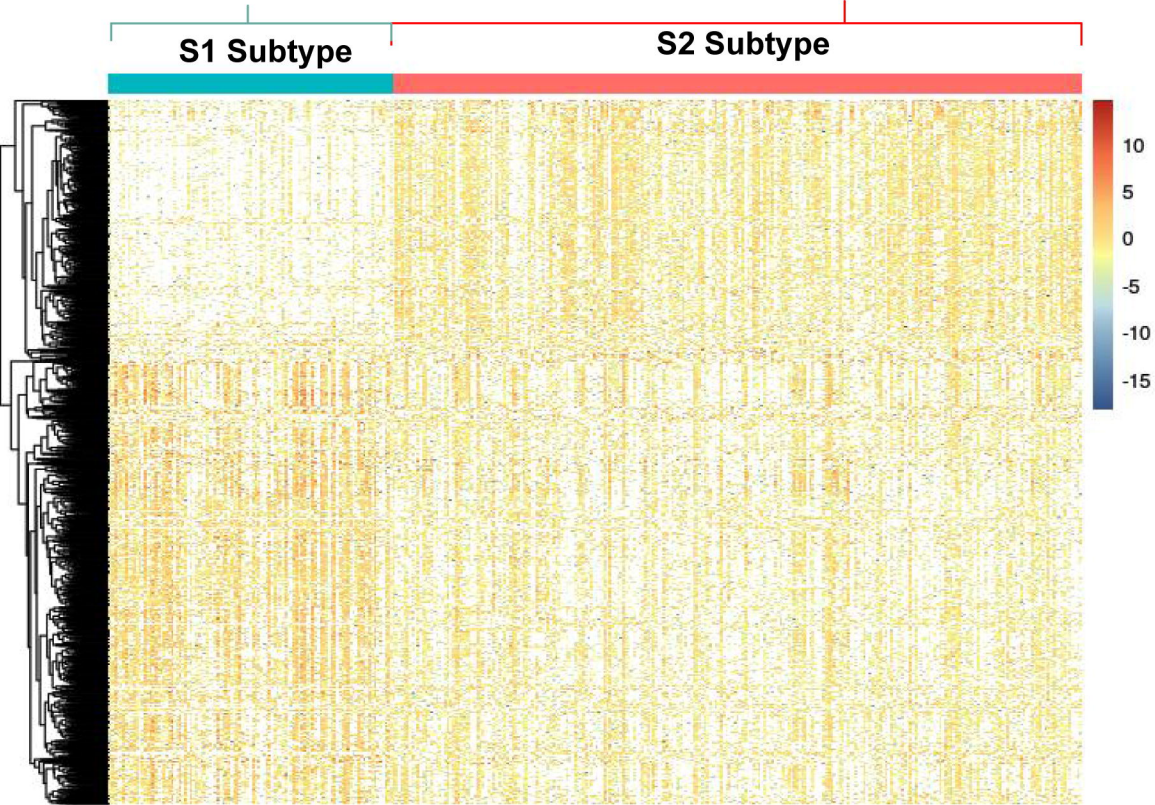



(B)

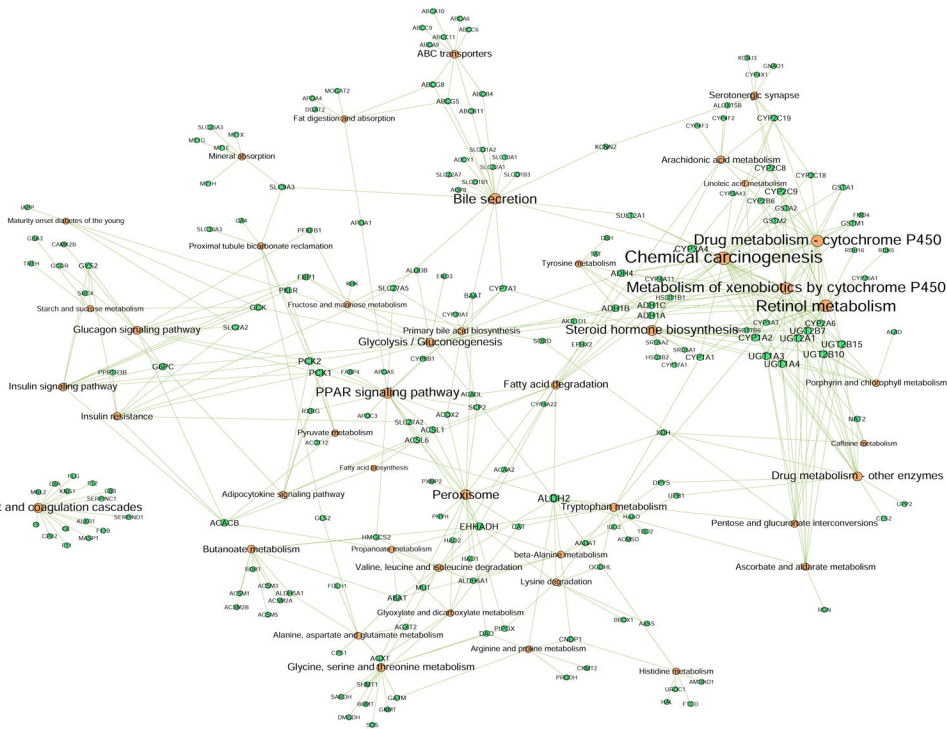

Source: http://biorxiv.org/content/10.1101/114892v1.full.pdf
